1 **Pathogen transmission from vaccinated hosts can cause dose-dependent reduction in**  
2 **virulence**

3

4 **Short title: Vaccination and the transmission of pathogen virulence.**

5

6 Richard I. Bailey<sup>1\*</sup>, Hans H. Cheng<sup>2</sup>, Margo Chase-Topping<sup>1,3</sup>, Jody K. Mays<sup>2</sup>, Osvaldo

7 Anacleto<sup>1,4</sup>, John R. Dunn<sup>2†</sup> and Andrea Doeschl-Wilson<sup>1†</sup>

8

9 **Affiliations:**

10 <sup>1</sup>Division of Genetics and Genomics, The Roslin Institute, Easter Bush, Midlothian, UK.

11 <sup>2</sup>USDA, Agricultural Research Service, US National Poultry Research Center, Avian Disease  
12 and Oncology Laboratory, East Lansing, MI 48823, USA.

13 <sup>3</sup>Usher Institute of Population Health Sciences & Informatics, University of Edinburgh,  
14 Edinburgh, UK.

15 <sup>4</sup>Current address: Institute of Mathematical and Computer Sciences, University of São Paulo,  
16 São Carlos, Brazil.

17

18 \*Corresponding author. Email: [r.bailey@ed.ac.uk](mailto:r.bailey@ed.ac.uk)

19 †Joint senior authors.

20

21 **Abstract**

22 **Many livestock and human vaccines are leaky as they block symptoms but do not**  
23 **prevent infection or onward transmission. This leakiness is concerning as it increases**  
24 **vaccination coverage required to prevent disease spread, and can promote evolution of**  
25 **increased pathogen virulence. Despite leakiness, vaccination may reduce pathogen load,**  
26 **affecting disease transmission dynamics. However, the impacts on post-transmission**  
27 **disease development and infectiousness in contact individuals are unknown. Here, we**  
28 **use transmission experiments involving Marek's disease virus in chickens to show that**  
29 **vaccination with a leaky vaccine substantially reduces viral load in both vaccinated**  
30 **individuals and unvaccinated contact individuals they infect. Consequently, contact**  
31 **birds are less likely to develop disease symptoms or die, show less severe symptoms, and**  
32 **shed less infectious virus themselves, when infected by vaccinated birds. These results**  
33 **highlight that even partial vaccination with a leaky vaccine can have unforeseen positive**  
34 **consequences in controlling the spread and symptoms of disease.**

35

## 36 **Introduction**

37 Vaccination is routinely used as an efficient and economical way to control the spread and  
38 symptoms of infectious diseases in humans and livestock. Vaccines vary in their protective  
39 properties [1,2], and while some completely block infection, others only prevent disease  
40 symptoms but not infection or onward transmission. The latter are termed ‘leaky’ or  
41 ‘imperfect’ vaccines. Leaky vaccines are commonly used to prevent or alleviate disease  
42 symptoms in livestock, and are becoming more prevalent among human vaccines [3].  
43 Leakiness allows pathogen populations to persist even at high levels of vaccination coverage  
44 [4], and reduced mortality of vaccinated individuals can lengthen their infectious period and  
45 hence promote the evolution of increased pathogen virulence [5]. A better understanding of  
46 the overall impacts on populations of vaccination with leaky vaccines is therefore urgently  
47 needed.

48

49 The underlying hypothesis in this paper is that vaccination with leaky vaccines not only has  
50 direct positive effects on vaccinated individuals, but also indirect positive effects on  
51 individuals in the same contact group. Often only a fraction of a population receives the  
52 direct benefits of vaccination, due to incomplete coverage and heterogeneity in vaccine  
53 responses [6-8]. However, vaccination even with a leaky vaccine often reduces pathogen load  
54 in infected individuals [5,9-15], with potential consequent reduction in the exposure dose of  
55 susceptible individuals. Transmission experiments, in which infected ‘shedders’ are placed in  
56 contact with uninfected ‘contact’ individuals and transmission recorded, have revealed that  
57 lower shedder pathogen load reduces transmission in some cases [5,16,17], but not all [13].  
58 Measures of vaccine effectiveness can include these indirect benefits for unvaccinated  
59 individuals, through dose-dependent reduction in transmission rates from infected vaccinated  
60 individuals [18]. However, beyond transmission effects, lower exposure dose can also

61 decrease pathogen load in newly infected hosts [19-21], potentially leading to decreased  
62 pathogen virulence [19-20,22-27] and infectiousness in these secondary cases. These  
63 downstream effects of leaky vaccines on disease development and spread are currently poorly  
64 understood. Here, we use transmission experiments with vaccinated versus sham-vaccinated  
65 shedders and only unvaccinated contact individuals, to examine how a leaky vaccine affects  
66 both transmission and subsequent pathogen virulence and load (and hence, potentially,  
67 infectiousness) in contacts.

68

69 *Gallid alphaherpesvirus 2*, more commonly referred to as Marek's disease virus (MDV), is a  
70 highly oncogenic herpesvirus of poultry causing worldwide annual losses of 1-2 billion USD  
71 [28]. It is an airborne pathogen, spreading via inhalation of virus-laden "chicken dust", which  
72 accumulates through shedding of infectious feather follicle epithelia [29]. Marek's disease  
73 (MD) symptoms include peripheral nerve enlargement, tumours in a variety of organs, wing  
74 and leg paralysis, and iris lymphoma causing pupil irregularities, as well as death. Infected  
75 birds remain infectious for life, and the virus can remain infectious in the environment for  
76 many months. Higher MDV ingestion dose has been reported to increase disease progression  
77 [27,30], but this effect has not previously been linked to vaccination or exposure dose under  
78 natural transmission. On top of clear welfare concerns, MD causes production losses at  
79 inspection due to a drop in egg production of laying hens [31], and symptoms known as  
80 "leukosis" leading to meat condemnation. Leukosis has other causative agents but is  
81 primarily due to MDV in chickens [32].

82

83 Management of MD led to development of the first widely-used anti-cancer vaccine, the  
84 related live turkey herpesvirus *Meleagrid alphaherpesvirus 1*, commonly referred to as HVT  
85 [33]. In the US, vaccination of all commercial poultry has been routine since the 1970s.

86 However, from the 1950s to the present day there have been several jumps in MDV virulence  
87 [34], each causing more severe symptoms and reducing the symptom-blocking effects of  
88 existing vaccines. Several generations of vaccines have been developed to combat this  
89 increased virulence, all of which are leaky and may in fact have contributed to continuing  
90 virulence evolution [5]. Currently, widespread vaccination leads to low production losses in  
91 the US commercial poultry industry. However, vaccination is not routine worldwide, and  
92 may vary considerably in quantity and quality [35], leading to incomplete effective vaccine  
93 coverage within a flock.

94

95 All MD vaccines including HVT are modified live viruses, and are therefore potentially  
96 transmissible. Whenever transmissible live vaccines are used, vaccine transmission itself can  
97 potentially confer some secondary downstream protection in unvaccinated contacts, in  
98 addition to the effect of reduction in transmission of pathogenic virus. The more recently  
99 developed, and widely-used, CVI988 (Rispens) MD vaccine is highly transmissible [36].

100 However, despite quite extensive shedding of HVT vaccine virus into the environment  
101 [37,38], HVT transmission is usually low, and is thought to be absent from young birds < 8  
102 weeks old vaccinated with low doses [39-41].

103

104 High variability in virulence among MDV strains [42], in genetic resistance among chicken  
105 strains [43], and in vaccine effectiveness [44] and transmissibility, combined with well-  
106 developed empirical methods for examining host infection and disease [45], make MDV in  
107 chickens an ideal model system to examine the relationships between vaccination with leaky  
108 vaccines and pathogen load, transmission, and subsequent virulence in non-vaccinated birds.

109

110 The overall aim of this study was to assess how vaccination with a leaky vaccine affects  
111 pathogen transmission and subsequent disease development in unvaccinated contact  
112 individuals. To investigate this, we carried out transmission experiments for MDV in  
113 chickens, where HVT-vaccinated or sham-vaccinated shedder birds inoculated with a virulent  
114 (vMDV) pathogen strain were placed in contact with unvaccinated naïve contact birds (Fig  
115 1). We chose HVT vaccine due to its low transmissibility, its wide usage both to combat  
116 MDV and as a vector vaccine, and due to our extensive previous experience with this vaccine  
117 allowing optimization of experimental methods. We chose to focus solely on a well-studied  
118 vMDV (rather than more virulent vvMDV or vv+MDV) pathogen strain to allow comparison  
119 with many past studies, and to maximize replication and hence our ability to detect  
120 differences in downstream effects. We used unvaccinated contacts to avoid confounding  
121 effects of vaccination on contact bird resistance and shedder transmission ability. We  
122 investigated to what extent vaccination reduces both MDV transmission and subsequent  
123 disease severity in contacts, and asked whether the effects of shedder vaccination on contacts  
124 were mediated by lower shedder viral load. We found that shedder vaccination led to a large  
125 reduction in contact bird disease symptoms, and provide strong evidence that this effect was  
126 mediated by pathogen load.

127

128 **Fig 1. Schematic overview of one “lot” (2 lots per replicate, one for each shedder vaccination**  
129 **status) of the MD transmission experiment.** In each lot, shedder birds were all either HVT-  
130 vaccinated or PBS sham-vaccinated. All contacts were unvaccinated. The experiment comprised 16  
131 replicates, each consisting of one lot in which three infected vaccinated shedders were placed in 48-  
132 hour contact with 15 naïve unvaccinated contacts at 2 time points, and one equivalent lot with sham-  
133 vaccinated shedders (4 additional sham-vaccinated lots were added as two of these had only 2  
134 shedders due to early death). In total, there were thus 1080 contacts and 106 shedder individuals  
135 distributed into 72 contact bird groups. Contact bird groups each had roughly equal numbers of males  
136 and females. All indicated time points (not to scale) are relative to the day of shedder inoculation with

137 wild-type virus. Open and closed symbols represent uninfected and infected chickens, respectively.

138 For all birds, necropsy was carried out to determine the presence and severity of disease symptoms

139 (tumours and peripheral nerve enlargement) at 8 weeks post-infection (shedders) or post-contact

140 (contact birds), or upon death/euthanasia, whichever was the sooner.

141

142

143 **Results**

144 **Establishing the transmission model and sampling times.** Unless otherwise stated,  
145 ‘transmission’, ‘virus’ and ‘viral load’ refer to the pathogenic MDV strain and not the  
146 vaccine virus strain. Appropriate contact duration and sampling times to examine shedder  
147 vaccination effects needed to be established in pilot experiments prior to the main trial. Pilot  
148 experiment methods and results are presented in Supplementary Information. As little as 4  
149 hours of contact between inoculated shedders and uninfected contacts was sufficient for most  
150 contact birds to become infected and show visible disease symptoms by 8 weeks post-contact  
151 (Fig S1). A contact duration of 2 days was subsequently chosen to ensure ample shedding  
152 time and to standardize time available for shedding of feather follicle epithelia by the  
153 shedders. Both vaccinated and sham-vaccinated shedders were positive for small quantities of  
154 virus in feather follicle epithelia by 7 days post-infection (hereafter DPI), but this feather  
155 viral load (hereafter FVL) had increased considerably by 10-12 DPI (Fig S2). When shedders  
156 were moved to a new set of contacts every 2 days from 10-20 DPI, the proportion of infected  
157 contacts, as measured by qPCR from feather and blood samples collected 14 days post-  
158 contact (hereafter DPC), was consistently high (Fig S3). However, while contact with sham-  
159 vaccinated shedders also consistently led to high incidence of disease symptoms at necropsy,  
160 contact with vaccinated shedders led to lower proportion of diseased contacts, in particular at  
161 the early contact periods. These temporal trends coincided with differences in shedder FVL,  
162 with higher overall FVL in sham-vaccinated birds, reaching a peak around 12 DPI, and lower  
163 FVL peaking around 20 DPI in vaccinated shedders (see Fig S2). Both groups of shedders  
164 then remained positive for virus in feathers for the 8-week duration.

165

166 Informed by the pilot data, we chose 13 and 20 shedder DPI as standardized contact start  
167 times in the main experiments (Fig 1) to capture the aforementioned temporal variation in



168 vaccine effects, and a 2-day contact period between shedders and contacts. Fourteen DPC  
169 was chosen as the time for contact bird blood and feather sampling, as it proved ample for  
170 build-up of FVL in infected contacts while minimizing among-contact transmission (Fig S4).  
171 Viral loads were highly correlated between blood and feathers (main experiment contact  
172 birds only, correlation coefficient  $r = 0.73$ ) and were typically higher and more often above  
173 the detection threshold in feathers, as shown previously [46]. Hence, we focused on viral load  
174 in feathers for all analyses, due to the dual benefits of the typically above-threshold level  
175 viral loads and the fact that feathers are the infectious tissue, hence increasing the likely  
176 association with infectiousness. Examination of the presence and severity of disease  
177 symptoms (tumours and peripheral nerve enlargement) at necropsy took place at 8 weeks  
178 post-infection (shedders) or post-contact (contacts), or when moribund, if this occurred  
179 earlier. The subsequent results only refer to analyses of data from the main experiment  
180 illustrated in Fig 1.

181

182 **Vaccination blocks shedder disease symptoms without blocking infection.** As expected,  
183 all shedder birds were positive for MDV as determined by qPCR, and vaccination almost  
184 universally blocked the development of disease symptoms at necropsy. Eighty out of 86  
185 sham-vaccinated shedders (93%; 4 out of 90 birds excluded due to early death from other  
186 causes) were MD-positive at necropsy, while only 5 out of 80 (6%) vaccinated shedders were  
187 MD-positive.

188

189 **Shedder vaccination does not block transmission but reduces contact bird disease**  
190 **development and pathogen load.** The complete set of contact bird analysis results are  
191 presented in Table S1 (Supplementary Information). Overall, vaccination of shedders did not  
192 block virus transmission, but dramatically reduced the negative impacts of infection in

193 contact birds. Almost all contacts became infected regardless of shedder vaccination status or  
194 DPI, with 100% (all 572 birds) contact bird infection for sham-vaccinated shedders and  
195 97.4% for vaccinated (442 out of 454). This difference, albeit small, was significant, with  
196 contacts of sham-vaccinated shedders 0-0.28 times as likely to remain uninfected as contacts  
197 of vaccinated (Fisher exact test: 16.82,  $p < 0.001$ , odds ratio = 0, 95% C. I. 0, 0.28). However,  
198 fewer infected contacts developed visible disease symptoms or died within 8 weeks (Fig 2a),  
199 and of those showing visible symptoms, shedder vaccination was associated with less severe  
200 contact bird symptoms, including fewer tissues with tumours and less severe enlargement of  
201 peripheral nerves, as illustrated by non-metric multidimensional scaling (Fig 2b).

202

203 **Fig 2. Summary of shedder impacts on contact birds.** (A) Impact of shedder vaccination status on  
204 contacts at 13 and 20 shedder DPI. Contacts positive for virus in qPCR from samples taken at 14  
205 DPC were classified as infected. "Diseased" individuals showed visible symptoms (peripheral nerve  
206 enlargement and/or tumours) at necropsy, 8 weeks post contact or upon death. "Dead" contacts were  
207 those that died or were humanely euthanized before the end of the 8-week experimental period, were  
208 infected, and were positive for disease symptoms at necropsy. HVT = vaccinated shedders; PBS =  
209 sham-vaccinated shedders. (B) Non-metric multidimensional scaling plot, for diseased contacts only,  
210 of relationships between contact bird disease severity variables and contact bird sex, shedder  
211 vaccination status and shedder FVL. Points are individual contact birds. Grey arrow distance along  
212 each axis represents its nonparametric Kendall's tau correlation with that axis. Opposite-pointing  
213 arrows indicate negative associations. Vaccinated individuals and males therefore had fewer tumours  
214 and less extreme nerve enlargement (VNE = vagus nerve enlargement; SNE = sciatic nerve  
215 enlargement; BNE = brachial nerve enlargement). Points are clustered from bottom-left to top-right  
216 into increasing numbers of tissues with tumours, concordant with changing point size; clustering in  
217 other directions indicates qualitatively different combinations of tissues with tumours. Variables differ  
218 qualitatively (binary, continuous or ordinal) and so correlation coefficients and hence arrow lengths  
219 may not be directly comparable. Shedder DPI effects not shown (see Results text and Table S1).

220

221 Infected contacts were much less likely to show visible disease symptoms at necropsy after  
 222 contact with vaccinated (232 out of 437 contacts; 53%) than sham-vaccinated (558 out of  
 223 569; 98%) shedders (Table 1). Disease symptoms in infected contacts were also more likely  
 224 in the 20 DPI than 13 DPI contact groups (mixed-model logistic regression:  $z = 4.5$ ,  $p <$   
 225  $0.0001$ ), but this temporal effect was smaller when shedders were sham-vaccinated  
 226 (vaccination status by DPI interaction;  $z = -2.3$ ,  $p < 0.05$ ). Males were marginally less likely  
 227 to show visible disease symptoms than females ( $z = -1.9$ ,  $p = 0.05$ ).  
 228

**Table 1 | Effects of shedder vaccination status on contact bird disease symptoms, mortality and feather viral load for a model also including contact bird sex and shedder DPI, but excluding DPI by vaccination status interaction. Full results, including models with the interaction, are in Table S1.**

| Contact bird response                   | Shedder vaccination coefficient (SE) <sup>6</sup> | Test                   |              |
|-----------------------------------------|---------------------------------------------------|------------------------|--------------|
|                                         |                                                   | statistic <sup>7</sup> | p value      |
| Disease status <sup>1</sup>             | 8.19 (1.50)                                       | 5.45                   | < 0.0001 *** |
| Mortality <sup>2</sup>                  | 1.74 (0.20)                                       | 8.76                   | < 0.0001 *** |
| N tissues with tumours <sup>3</sup>     | 0.50 (0.13)                                       | 3.71                   | < 0.0005 *** |
| Vagus nerve enlargement <sup>4</sup>    | 0.22 (0.23)                                       | 0.94                   | 0.35         |
| Brachial nerve enlargement <sup>4</sup> | 1.30 (0.26)                                       | 5.01                   | < 0.0001 *** |
| Sciatic nerve enlargement <sup>4</sup>  | 1.30 (0.24)                                       | 5.36                   | < 0.0001 *** |
| Feather viral load <sup>5</sup>         | 1.98 (0.11)                                       | 18.3                   | < 0.0001 *** |

<sup>1</sup>Infected contacts (qPCR) only. Logistic regression. Coefficient = mean log odds ratio for presence of contact disease symptoms when exposed to sham-vaccinated relative to vaccinated shedders.

<sup>2</sup>Infected contacts (qPCR) only. Cox proportional hazards. Coefficient = log hazard ratio of contact death at a given time point associated with sham-vaccinated relative to vaccinated shedders.

<sup>3</sup>Diseased contacts (necropsy) only. Poisson GLM. Coefficient = mean difference in number of contact tissues containing tumours with sham-vaccination.

<sup>4</sup>Diseased contacts (necropsy) only. Ordinal logistic regression. Coefficient = proportional log odds of an increase in contact nerve enlargement ranking with sham-vaccination.

<sup>5</sup>All contacts. Least square mean difference in contact bird  $\log_{10}(\text{viral load} + 1e-5)$  with sham-vaccinated relative to vaccinated shedders.

<sup>6</sup>Positive = increase in contacts when exposed to sham-vaccinated relative to vaccinated shedders, except for Feather viral load ( $> 1$  = increase with sham-vaccination).

<sup>7</sup>t statistic for linear regression, z statistic for all other models.

229

230 Mortality rates were also much lower among infected contacts exposed to vaccinated  
231 shedders (Fig 3), with those exposed to sham-vaccinated shedders being 6 times more likely  
232 to die per unit time (95% C. I. 3.9, 8.4; Table 1). Controlling for vaccination effects, contacts  
233 exposed to shedders at 20 DPI were almost twice as likely to die as those exposed to shedders  
234 at 13 DPI (95% C. I. 1.3, 2.1;  $z = 3.6$ ,  $p < 0.0005$ ).

235

236 **Fig 3. Cox proportional hazards estimated survival probability curves for all combinations of**  
237 **shedder vaccination status and days post-inoculation (DPI).** Shaded areas represent 95%  
238 confidence intervals. HVT = vaccinated shedders; PBS = sham-vaccinated shedders. Note that all  
239 mortality up to 7 days post contact (DPC) was assumed to be chick mortality unrelated to MD, and  
240 these individuals were excluded from all analyses.

241

242 Among contacts positive for disease symptoms at necropsy, shedder vaccination led to  
243 significantly lower disease severity (number of tissues with tumours, and enlargement of 3  
244 peripheral nerves; see Fig 2b) for all individual symptoms except vagus nerve enlargement  
245 (Table 1). There was no evidence for an increase in contact bird disease severity between  
246 shedder DPI 13 and 20 for either vagus nerve (mixed-model ordinal logistic regression:  $z = -$   
247  $0.1$ ,  $p = 0.89$ ) or tumours ( $z = 1.2$ ,  $p = 0.21$ ), but marginal evidence for greater brachial nerve  
248 enlargement ( $z = 1.9$ ,  $p = 0.06$ ) and a significant increase in sciatic nerve enlargement ( $z =$

249 3.1,  $p < 0.005$ ) associated with the later exposure time. Regardless of the shedder vaccination  
250 status and exposure time, disease severity was significantly higher in contact females than  
251 males for all symptoms (Fig 2b; Table S1).

252

253 Next, we tested the extent to which shedder vaccination status also influenced contact FVL as  
254 an indicator of the infectiousness of contact birds, which has potentially important knock-on  
255 effects for epidemiological dynamics. Infectiousness is likely to be determined by the amount  
256 of virus shed into the environment. Across all individuals, contact bird FVL at 14 DPC was  
257 much higher when exposed to sham-vaccinated than vaccinated shedders (Table 1, Fig 4).

258 Contact FVL was also higher when exposed to shedders at 20 DPI than 13 DPI (mixed-model  
259 linear regression:  $t = 4.9$ ,  $p < 0.0001$ ).

260

261 **Fig 4. Box and whisker plot of shedder and contact feather viral loads at 13 and 20 DPI.**

262 Horizontal bars are medians. Boxes cover the 1<sup>st</sup> to 3<sup>rd</sup> quartile, and vertical lines extend to maxima  
263 and minima except in the presence of outliers (filled circles). Shedder feather samples were taken at  
264 the start of each contact period, contact samples at 14 DPC. A small value ( $1e-5$ ) was added to  
265 feather viral load values prior to log transformation, and hence the  $\log_{10}(\text{viral load})$  for birds negative  
266 for virus was -5.

267

268 In summary, contact birds exposed to vaccinated shedders still became infected, but were  
269 considerably less likely to develop disease, experienced milder symptoms and lower  
270 mortality, and had lower feather viral loads.

271

272 **Shedder vaccination effects on contacts are mediated by feather viral load.** We

273 hypothesized that the effects of shedder vaccination on contacts, described above, were

274 mediated by a reduction in shedder FVL with vaccination, leading to a reduction in contact

275 exposure dose with knock-on effects for disease development. To test this hypothesis, we  
276 followed the protocol for process analysis using regression, outlined in the Statistical  
277 Analysis section of the Methods. Before this, we tested whether HVT vaccine transmission  
278 occurred and might contribute to the described downstream effects.  
279  
280 HVT-specific qPCR on peripheral blood lymphocyte (PBL) samples of all contact birds from  
281 6 contact bird groups (3 groups with zero contact bird mortality and 3 with high mortality)  
282 revealed that only 8/89 (9%) unvaccinated contact birds were positive for HVT. HVT-  
283 positive birds were evenly distributed across contact groups, with 5/6 groups containing at  
284 least one positive bird (one low-survival group had no positive birds), and no group  
285 containing more than 2 positive birds. According to Fisher exact tests, there were no  
286 significant differences in proportions positive for HVT between high- and low-survival  
287 groups (Fisher exact test:  $p = 0.71$ , odds ratio = 0.59, 95% C. I. 0.09, 3.26). HVT  
288 transmission was unexpected given the young age of shedders and low vaccination dose [39-  
289 41], but was nevertheless too low to provide statistically significant evidence for secondary  
290 protective effects impacting contact bird FVL and disease progression. We therefore did not  
291 explicitly consider HVT vaccine transmission in our subsequent analyses, while  
292 acknowledging the possibility that transmission of undetectably small quantities of HVT that  
293 may enhance the downstream effects of vaccinated shedders may exist.  
294  
295 Sham-vaccinated shedders had much higher FVL than vaccinated (mixed-model linear  
296 regression:  $t = 13.35$ ,  $p < 0.0001$ ; Fig 4). There was a highly significant increase in shedder  
297 FVL at 20 DPI over 13 DPI ( $t = 7.49$ ,  $p < 0.0001$ ), but the highly significant interaction  
298 between vaccination status and DPI ( $t = -5.03$ ,  $p < 0.0001$ ) revealed that this temporal change  
299 only occurred in vaccinated shedders.

300

301 Replacing shedder vaccination status with shedder FVL as a covariate in the statistical  
 302 models for contact birds, revealed that the effects of shedder FVL on contacts followed the  
 303 same pattern as the effects of shedder vaccination status. Higher shedder FVL led to a small  
 304 but significant increase in contact bird infection probability (univariate logistic regression:  
 305 log odds = 0.76,  $z = 3.0$ ,  $p < 0.005$ ), with predicted infection probability increasing from  
 306 0.946 at the lowest shedder FVL values to 0.997 at the highest. Higher shedder FVL led to  
 307 greater contact bird disease prevalence and severity, greater mortality, and higher contact  
 308 FVL (Table 2).

309

| <b>Table 2   Effects of shedder feather viral load on contact bird disease symptoms and feather viral load, for a model also including contact sex and shedder DPI, but not including shedder vaccination status. Full results in Table S1.</b> |                                      |                                   |                |  |
|-------------------------------------------------------------------------------------------------------------------------------------------------------------------------------------------------------------------------------------------------|--------------------------------------|-----------------------------------|----------------|--|
| <b>Contact bird response</b>                                                                                                                                                                                                                    | <b>Shedder viral load slope (SE)</b> | <b>Test statistic<sup>6</sup></b> | <b>p value</b> |  |
| Disease status <sup>1</sup>                                                                                                                                                                                                                     | 3.83 (0.62)                          | 6.17                              | < 0.0001 ***   |  |
| Mortality <sup>2</sup>                                                                                                                                                                                                                          | 0.93 (0.11)                          | 8.76                              | < 0.0001 ***   |  |
| N tissues with tumours <sup>3</sup>                                                                                                                                                                                                             | 0.34 (0.09)                          | 3.57                              | < 0.0005 ***   |  |
| Vagus nerve <sup>4</sup>                                                                                                                                                                                                                        | 0.24 (0.16)                          | 1.51                              | 0.13           |  |
| Brachial nerve <sup>4</sup>                                                                                                                                                                                                                     | 0.91 (0.17)                          | 5.4                               | < 0.0001 ***   |  |
| Sciatic nerve <sup>4</sup>                                                                                                                                                                                                                      | 0.90 (0.16)                          | 5.57                              | < 0.0001 ***   |  |
| Feather viral load <sup>5</sup>                                                                                                                                                                                                                 | 0.83 (0.08)                          | 10.33                             | < 0.0001 ***   |  |

<sup>1</sup>Infected contacts (qPCR) only. Logistic regression. Coefficient = increase in log odds ratio for presence of contact disease symptoms with 1 unit increase in shedder FVL.

<sup>2</sup>Infected contacts (qPCR) only. Cox proportional hazards. Coefficient = increase in log hazard ratio of contact death at a given time point with 1 unit increase in shedder FVL.

<sup>3</sup>Diseased contacts (necropsy) only. Poisson GLM. Coefficient = increase in number of contact tissues containing tumours with 1 unit increase in shedder FVL.

<sup>4</sup>Diseased contacts (necropsy) only. Ordinal logistic regression. Coefficient = increase in proportional log odds of contact nerve enlargement ranking with 1 unit increase in shedder FVL.

<sup>5</sup>All contacts. Increase in contact FVL with 1 unit increase in shedder FVL.

<sup>6</sup>t statistic for linear regression, z statistic for all other models.

310

311 Including shedder FVL in a model alongside vaccination status reduced, but did not always  
312 remove, the significance of vaccination status for all contact bird disease variables (Table  
313 S1). This indicated that shedder FVL at least partially explained the impacts of shedder  
314 vaccination on infected contacts. However, the further addition of contact FVL and sum of  
315 contact groupmate FVL (the latter to account for possible among-contact infection during the  
316 8-week experimental period) as predictors fully explained the effects of shedder vaccination  
317 on contact disease and survival, rendering shedder vaccination status non-significant in all  
318 models (Fig 5). The results indicate that shedder vaccination effects on contacts are fully  
319 mediated by FVL of shedders and infected contacts.

320

321 To examine whether the presence of even undetectably small quantities of vaccine virus in  
322 contact birds might affect the causal relationship between same-individual viral load and  
323 disease development, we carried out further multiple regression analyses, with contact bird  
324 pathogen FVL nested within shedder vaccination treatment. As expected in the absence of  
325 any extra effect of vaccine transmission, contact FVL remained significant within each  
326 vaccination treatment (except for vagus nerve, which was non-significant in results presented  
327 Tables 1 and 2), with similar effect size estimates in each (Table S1).

328

329 **Fig 5. Diagrammatic representation of the mediating effects of viral load on contact bird binary**  
330 **disease status.** Each arrow colour represents a different multiple regression analysis, with arrows



331 pointing from predictors to response. Arrow thickness represents regression coefficient (all significant  
332 or marginal relationships were positive). The diagram shows that the effect of shedder FVL on contact  
333 FVL (see Table 2) fails to fully explain the shedder vaccination effect, which remains significant when  
334 both variables are included (purple arrows). The same is true for the cumulative FVL of all infected  
335 group-mates (yellow arrows). However, the three FVL predictor variables completely remove the  
336 effect of shedder vaccination status (blue arrows) in explaining contact disease status (see Table 1),  
337 and this is true for all other contact disease variables (Table S1). This implies that shedder  
338 vaccination effects on contacts are fully mediated by FVL of infected individuals in a contact group.  
339 Significance is indicated by asterisks: \*\*\*  $p < 0.001$ , \*\*  $p < 0.01$ , \*  $p < 0.05$ , ns = not significant.  
340 Marginally non-significant p-values are presented numerically. All results presented here are from  
341 models excluding the DPI by vaccination status interaction, but including sex and DPI main effects  
342 (not shown, see Table S1).

343

344

345 **Discussion**

346 We used controlled experiments involving natural virus transmission to reveal that  
347 vaccination with a leaky vaccine, which only marginally reduces transmission, can  
348 significantly reduce post-transmission disease development and mortality among  
349 unvaccinated contact individuals. Our analysis indicates that this effect is mediated by a  
350 reduction in exposure dose experienced by susceptible individuals when exposed to  
351 vaccinated shedders, leading to lower pathogen load and concomitant reduced symptoms in  
352 contact birds. The primary objectives of vaccination of livestock with leaky vaccines are to  
353 improve animal welfare and to reduce production losses caused by disease symptom  
354 development. Our results show that even partial vaccination against MD can substantially  
355 reduce disease symptoms and mortality in the whole flock, leading to universally positive  
356 impacts on animal welfare and productivity, and these conclusions may extend to leaky  
357 vaccines used in other systems.

358

359 Modified live virus vaccines, such as HVT and other MD vaccines, have the potential to be  
360 transmitted and cause secondary vaccination [37-41], and this may partially explain our  
361 results. Unlike in previous studies, showing that HVT transmission only occurred from older  
362 birds vaccinated with higher doses [39-41], we found non-zero transmission of HVT from  
363 young birds vaccinated with a low dose. However, with HVT virus absent or below  
364 detectable levels in 90% of contacts of vaccinated shedders, HVT transmission would fail to  
365 explain the reduced contact bird MDV viral load and disease progression in our statistical  
366 analyses. We found that shedder FVL, our measure of exposure dose, did not always fully  
367 explain the shedder vaccination effects on contact birds. This may be because feather samples  
368 taken at the start of a 48-hour contact period provide an imperfect proxy for exposure dose. It  
369 may also be due to the presence of another factor, such as vaccine transmission, further

370 influencing both contact bird viral load and disease progression, and their associations.  
371 However, contact bird FVL strongly and equally explained disease progression in contacts of  
372 each of vaccinated and unvaccinated shedders, suggesting no additional factors influencing  
373 this relationship in the vaccinated treatment. Vaccine transmission nevertheless remains  
374 potentially important and should be addressed in future, for both MDV and other diseases  
375 treated with transmissible vaccines.

376

377 One of the key findings of this study was that shedder vaccination effects on MD symptom  
378 prevalence and subsequent mortality within each contact group were fully explained by the  
379 summed FVL of all infected group members, measured at a relatively early stage of the  
380 epidemic, prior to onset of contact-contact transmission. This would suggest that contacts  
381 exposed to vaccinated shedders experienced overall lower cumulative exposure dose,  
382 including from other infected contacts, over the course of 8 weeks, resulting in milder  
383 symptoms and lower mortality. This negative feedback on the environmental pathogen  
384 burden strongly advocates for the application of MD intervention strategies that reduce either  
385 within-host or environmental virus load, even if only moderately [47]. In general, depending  
386 on the relationship between exposure dose and subsequent within-host replication in any  
387 particular system, targeting reduction in pathogen load in intervention strategies may have  
388 greater positive knock-on effects than currently assumed.

389

390 Increased disease severity with higher virus inoculation dose has been shown previously for  
391 MD in chickens [27,30], but not with natural transmission and not linked to interventions  
392 such as vaccination. The route of infection is known to alter the extent of infection and  
393 number of diseased tissues [48], hence it is important to mimic the field situation closely in  
394 order to accurately predict the outcome of vaccination and other intervention strategies in this

395 and other systems. It is also important to measure pathogen load specifically in the infectious  
396 tissues where possible, or to measure shedding directly, as tissues may differ in the strength  
397 of association between their pathogen load and infectiousness. Vaccine experiments routinely  
398 establish the protective effect of vaccination on infection or disease progression, and  
399 pathogen shedding, in vaccinated individuals themselves [49], and occasionally also examine  
400 onward transmission. The novelty and primary focus of this study was to determine the  
401 effects of vaccination of ‘shedder’ individuals on disease progression and infectiousness  
402 specifically in newly infected, unvaccinated, contact individuals. To date, little is known  
403 about these potential ‘downstream’ effects of vaccination, and the majority of  
404 epidemiological models that predict the consequences of vaccination on disease spread and  
405 pathogen evolution assume that these don’t exist [3,50]. Our findings that vaccination affects  
406 downstream pathogen load and host survival and hence, potentially, onward pathogen  
407 transmission, in a dose-dependent manner may have profound consequences for such  
408 predictions. Particularly in systems where an individual’s infectiousness is strongly  
409 influenced by its pathogen load, existing estimates of the required vaccine coverage for  
410 achieving so-called herd immunity, i.e. for preventing disease spread within a population,  
411 may be upwardly biased. Based on current estimates, herd immunity is assumed to require  
412 high coverage when vaccines are leaky [18,51]. Complete vaccine coverage is not typical for  
413 all infectious diseases throughout the world, and even where it is routine, vaccine  
414 administration can vary in quality. Furthermore, high variation in vaccine responsiveness  
415 may render a significant proportion of vaccinated animals effectively non-immunized [52].  
416 The results of our study suggest that partial vaccination or high prevalence of vaccine non-  
417 responders may impose less risk with respect to disease invasion and persistence than  
418 anticipated from existing theory [4,53,54]. Prediction of the coverage required for herd  
419 immunity would benefit from an understanding of the downstream effects of vaccination-

420 induced changes in exposure dose and their effects on individuals' infectiousness and  
421 survival in any particular system. These insights would also be useful for the development of  
422 dynamic epidemiological models that incorporate dose-dependent transmission effects and  
423 the impact of interventions on these [19,24,55-57].

424

425 Vaccination with leaky vaccines has been implicated in the evolution of increased pathogen  
426 virulence, primarily because vaccination reduces host mortality without preventing disease  
427 spread, allowing infectious hosts more time to transmit virulent pathogen strains [3,5,50].

428 The best evidence for this effect comes from studies of MDV [5]. Our results, showing that  
429 partial vaccination reduces mortality in the whole flock without strongly reducing the number  
430 of secondary infections, indicate that optimum virus virulence (measured under standardized  
431 conditions) should be higher than previously expected in a mixed flock. However, this  
432 expectation is specific to this particular combination of pathogen, vaccine and host. The viral  
433 load of more virulent MDV strains has been shown to drop less with vaccination [5,58], in  
434 which case the exposure dose and therefore downstream mortality in unvaccinated  
435 individuals would also be expected to drop less. This represents an addition to the mortality-  
436 virulence trade-off hypothesis for the impact of leaky vaccines on virulence evolution, and  
437 has support from virulence evolution experiments in a rodent system [59,60]. On the one  
438 hand, increased differences in viral load linked to virulence may lead to an increase in the  
439 relative fitness of more virulent strains under vaccination, due to relatively higher  
440 transmission. On the other hand, given our results, vaccination should have a smaller effect in  
441 reducing downstream (unvaccinated) host mortality with more virulent strains. The mortality-  
442 virulence trade-off therefore remains important in the presence of this effect, and further  
443 modelling is required to predict the optimum virulence in these circumstances. Furthermore,  
444 the lower pathogen load and slightly reduced rate of spread revealed here – the latter effect

445 potentially being stronger in other systems - would lower the effective population size of the  
446 virus, therefore lowering the probability of establishment and fixation of new beneficial  
447 mutations such as those increasing virulence [61]. This may partially explain why years pass  
448 between reported increases in MDV virulence, despite 59 billion chickens being reared  
449 annually worldwide [34,62]. The results of this study therefore suggest that existing models  
450 of virulence evolution would benefit from incorporation of dose response effects on  
451 downstream disease severity and mortality such as those detected here.

452

453 Vaccination is often not the only available intervention technique, and others such as  
454 improved animal husbandry techniques or genomic selection of genetically more resistant  
455 individuals [63-65] may also be available and cost-effective. The mediating effect of  
456 pathogen load can be used as a link for comparison between the effects of different  
457 interventions on pathogen dynamics and disease severity. Chickens are known to vary  
458 genetically in their resistance to MD [63], and hence a next step in understanding the benefits  
459 of interventions in this system would be to compare vaccination effects with host genetic  
460 effects. Such studies would also remove any potential influence of vaccine transmission.  
461 Furthermore, more virulent virus strains tend to result in higher viral shedding rates and may  
462 differ in their response to vaccination [5]. Hence, future studies to test the validity of our  
463 findings for multiple MDV and vaccine strains are warranted.

464

465 With the increasing development of leaky vaccines for treatment of human as well as  
466 livestock infectious diseases [3], there is great benefit in improving prediction of their  
467 consequences for host welfare, pathogen dynamics and virulence evolution. The currently  
468 neglected downstream, post-transmission effects we revealed in this study are likely to  
469 impact all of these important facets of infectious disease biology, and hence disease

470 management strategies. They therefore merit greater attention in future vaccine-related

471 studies.

472

473

474 **Methods**

475 **Transmission experiments.** Experiments were carried out at USDA, ARS, USNPRC, Avian  
476 Disease and Oncology Laboratory (ADOL), East Lansing, USA, during 2018. All  
477 experiments used 15I<sub>5</sub> x 7<sub>1</sub> white leghorn chickens, a F1 hybrid cross of MD-susceptible 1515  
478 males and 7<sub>1</sub> females [43]. These maternal antibody-negative chickens were reared from a  
479 SPF breeding flock housed in isolators that have received no MD vaccination or exposure.  
480 The flock was negative for MDV antibodies and also for exogenous avian leukosis virus and  
481 reticuloendotheliosis virus, as established by routine surveillance testing. All bird  
482 experiments were approved by the ADOL Animal Care and Use Committee and were carried  
483 out in negative pressure Horsfall-Bauer isolators. Birds were monitored at least daily  
484 throughout the experiment and were humanely euthanized upon reaching established humane  
485 endpoint criteria.

486

487 The experiments involved two types of shedders, with shedder birds either vaccinated at  
488 hatch via intra-abdominal (IA) inoculation with 2,000 PFU of HVT (*Meleagrid*  
489 *alphaherpesvirus* 1) [33], or sham-vaccinated with PBS (phosphate-buffered saline). Each  
490 shedder bird was then challenged with 500 PFU of virulent MDV (strain JM/102W) at 5 days  
491 post-vaccination (0 DPI). Each contact group of birds within each replicate consisted of 3  
492 shedder birds of the same vaccination treatment (HVT or PBS) to be placed in contact with  
493 15 unvaccinated, uninfected contacts (Fig 1). The 3 shedders were placed with the first group  
494 of 15 uninfected contacts at 13 DPI for 48 hours, before being removed back to their isolator  
495 at 15 DPI. They were then placed with a second group of 15 contacts at 20 DPI until 22 DPI.  
496 Contact chicks were hatched weekly so that all contact birds were within 4 days of age when  
497 shedders were first introduced. There were 16 replicates consisting of paired lots of shedder  
498 birds (one lot with 3 vaccinated shedders put into contact with 15 contacts at the two time



499 points, and the other with 3 sham-vaccinated shedders), and 4 further sham-vaccinated only  
500 replicates. These additional replicates were carried out due to early death of 2 sham-  
501 vaccinated shedders involved in the earlier replicates.

502

503 Shedders were then monitored until 8 weeks post-infection and contacts until 8 weeks post-  
504 contact, and mortality (death or euthanasia) recorded. Necropsy was carried out at 8 weeks or  
505 upon death, whichever was the sooner, to determine the presence and severity of MD  
506 symptoms.

507

508 Blood (100  $\mu$ l) and primary feather samples were taken from shedders at the start of each  
509 contact period (13 and 20 DPI) and from contacts at 14 DPC. Based on earlier experiments,  
510 14 DPC was sufficient for build-up of virus in blood and feathers but early enough to avoid  
511 cross-contamination from other contact birds (Supplementary Information). If HVT vaccine  
512 virus transmission occurred, 14 days would also be sufficient for HVT to replicate to close to  
513 its maximum viral load in the new host [36-38,66]. DNA samples isolated from feather pulp  
514 and peripheral blood lymphocytes (PBLs) were used for qPCR to determine virus load. Each  
515 measurement was taken from a unique sample.

516

517 DNA from each tissue type was isolated using the Puregene DNA isolation kit (Gentra  
518 System, Minneapolis, MN) followed by a multiplex PCR using methods as previously  
519 described for MDV [67] and HVT [68]. The TaqMan assay used FAM-TAM probes for virus  
520 gB and VIC-TAM probes for the cellular GAPDH. Results were reported as the ratio of virus  
521 gB copies per GAPDH copies, estimated using standard curves consisting of 10- fold serial  
522 dilutions of plasmids containing either virus gB or GAPDH. Amplifications were performed  
523 at Michigan State University, USA, using the ABI Quant Studio 7Flex BI 7500.

524

525 **Statistical analyses.** Forty-two of 1080 contacts were removed from the dataset prior to  
 526 analysis due to chick mortality (death up to 7 days old), with some further filtering for data  
 527 quality and death by other causes. Final sample sizes were 211 (shedder FVL as response),  
 528 1005 (infected contacts only), 789 (diseased contacts only) and 1023 (all contacts regardless  
 529 of infection or disease status). The transmission experiments were analysed using various  
 530 linear and generalized linear mixed models in R 3.6.0 [69], depending on the type of the  
 531 response variable (Table 3). Regression analyses followed the logic of process analysis [73]  
 532 to assess the role of pathogen load in mediating shedder vaccination effects on contacts,  
 533 details below. Non-metric multidimensional scaling for Fig 2b was carried out in PC-ORD v.  
 534 7.0 [74] statistical software. All statistical tests were two-sided. No adjustments were made  
 535 for multiple comparisons.  
 536

| Table 3   Summary of modelled response variables. |                                              |                    |                               |                                                        |                          |
|---------------------------------------------------|----------------------------------------------|--------------------|-------------------------------|--------------------------------------------------------|--------------------------|
| Response variable                                 | Description                                  | Source             | Coefficient interpretation    | Statistical model                                      | Data subset <sup>6</sup> |
| Disease status                                    | Binary presence/absence of visible disease   | Necropsy           | Log odds                      | Logistic regression (GLM binomial errors) <sup>1</sup> | Infected                 |
|                                                   | symptoms                                     |                    |                               |                                                        |                          |
| Mortality                                         | Day of death/euthanasia or last day of study | Daily observations | Log proportional hazard ratio | Right-censored Cox proportional hazards <sup>2</sup>   | Infected                 |
|                                                   |                                              |                    |                               |                                                        |                          |
| N tissues with tumours                            | Number of tissues with visible tumours       | Necropsy           | Log relative risk             | GLM Poisson errors <sup>3</sup>                        | Diseased                 |

|                                                                                                                                                                                                                                                                                                                                                                                                                                                                                                                                                                                              |                                                             |          |                        |                                          |          |
|----------------------------------------------------------------------------------------------------------------------------------------------------------------------------------------------------------------------------------------------------------------------------------------------------------------------------------------------------------------------------------------------------------------------------------------------------------------------------------------------------------------------------------------------------------------------------------------------|-------------------------------------------------------------|----------|------------------------|------------------------------------------|----------|
| Nerve enlargement                                                                                                                                                                                                                                                                                                                                                                                                                                                                                                                                                                            | Qualitative ranking of nerve enlargement (0-4)              | Necropsy | Log proportional odds  | Ordinal logistic regression <sup>4</sup> | Diseased |
| Viral load                                                                                                                                                                                                                                                                                                                                                                                                                                                                                                                                                                                   | $\log_{10}(\text{Ratio of virus to GAPDH quantity} + 1e-5)$ | qPCR     | Mean relative quantity | Ordinary linear regression <sup>5</sup>  | All      |
| <sup>1</sup> R function glmer in lme4 package [70]; logit link.<br><sup>2</sup> R function coxph in survival package [71].<br><sup>3</sup> R function glmer in lme4 package; log link.<br><sup>4</sup> R function clmm in ordinal package[72]; logit link.<br><sup>5</sup> R function lmer in lme4 package; identity link.<br><sup>6</sup> Infected = positive for virus in qPCR of one or both of feather and blood samples; Diseased = presence of visible disease symptoms (tumours and/or peripheral nerve enlargement) at necropsy; All = all contact individuals including uninfected. |                                                             |          |                        |                                          |          |

537

538 First, we tested the direct treatment effect (shedder vaccination status) on the outcome  
 539 variables (contact disease variables, Table 3). The model formulae also included as fixed  
 540 effects contact bird sex and shedder DPI, and a vaccination status by DPI interaction, which  
 541 was removed if non-significant. Replicate, and contact group nested within replicate, were  
 542 included as random effects in all models except for the survival analysis, for which contact  
 543 group and replicate were included as clustering variables. Each contact individual was treated  
 544 as a data point. For this and all subsequent analyses, testing contact feather viral load (FVL)  
 545 as response involved all contact individuals, infected or uninfected (Table 3). Contact binary  
 546 disease status and mortality analyses involved infected (from qPCR) contacts only, and  
 547 disease severity variables (tumours and nerve enlargement) involved diseased (from  
 548 necropsy) contacts only.

549

550 Second, we carried out a process analysis, for which we tested all intermediate steps in the  
551 following proposed causal chain (see Fig 5): we hypothesized that the impacts of shedder  
552 vaccination status on the various contact infection and disease variables were primarily  
553 mediated by the vaccine effect on shedder feather viral load (FVL). More specifically we  
554 hypothesized that shedder vaccination directly reduces shedder FVL and consequently also  
555 the exposure dose of contacts. The resulting lower exposure dose may reduce the probability  
556 of becoming infected and/or may lead to lower ingestion dose, and consequently also to  
557 lower viral load in infected contacts. Lower contact viral load reduces the probability in  
558 infected contacts of developing visible disease symptoms or dying within the 8-week  
559 experimental period, and also reduces disease severity among individuals positive for  
560 symptoms at necropsy. Eight weeks is also sufficient time for infected contacts to become  
561 infectious themselves, and for disease development to occur in contacts infected by other  
562 contacts. Hence it was necessary to also consider the FVL of infected group mates alongside  
563 shedder and contact FVL in the process analysis.

564

565 Transmission of HVT was non-zero, but nevertheless too low in a subsample of 6 contact  
566 bird groups to explain the vaccination effect (see Results section), and was therefore not  
567 explicitly included in our process analysis. We began the process analysis by testing whether  
568 shedder FVL explained a similar amount of contact bird disease variation as shedder  
569 vaccination status, by replacing shedder vaccination status with shedder FVL in the model  
570 formula described in the first step above. We then tested to what extent shedder FVL was  
571 affected by vaccination, and then to what extent contact FVL and the sum FVL of each  
572 contact bird's groupmates (hereafter denoted as groupmate FVL) were affected by  
573 vaccination and shedder FVL. Thus, for contact FVL and groupmate FVL as response  
574 variables, the model formulae were the same as described in the first step above, with the

575 addition of sum of shedder FVL for each contact group as a fixed effect. Conversely, when  
576 shedder FVL was tested as a response variable, we used each individual shedder feather  
577 sample as a data point, and hence there were two data points per shedder individual (13 and  
578 20 DPI). For this test we used the same fixed effects model formula as described in the first  
579 step, above, while replicate and shedder individual were included as random effects, the latter  
580 to account for repeated measures.

581

582 The values for contact FVL at 14 DPC were calculated as  $\log_{10}(\text{contact FVL} + 1e-5)$  for each  
583 individual. The contact groupmate FVL variable was the sum of FVL at 14 DPC of all 15  
584 contacts in a group, minus the value for the focal individual. This variable was also analysed  
585 as  $\log_{10}(\text{groupmate FVL} + 1e-5)$ . For shedder FVL as a predictor, we calculated  
586  $\log_{10}(\text{sum}(\text{shedder FVL} + 1e-5))$  across the 3 shedders, from feather samples collected at the  
587 start of the contact period with each group of 15 contacts (13 and 20 DPI).

588

589 Third and finally, we tested whether shedder vaccination status exerted any effect on contact  
590 disease variables when controlling for mediating effects (shedder, contact, and contact  
591 groupmate FVL). If shedder vaccination status were to be rendered non-significant when  
592 tested alongside FVL variables, this would support the hypothesis that shedder vaccination  
593 impacts on contact disease were fully mediated by their effects on FVL. We first added  
594 shedder FVL alone to the basic model described in step 1, above, to test whether this variable  
595 was an effective bioindicator of shedder vaccination effects in secondary cases (infected  
596 contacts). We then further added contact and groupmate FVL to the model. Same-individual  
597 viral load is expected to be the strongest indicator of disease status, and so we expected  
598 shedder vaccination status and shedder and groupmate FVL to become non-significant in this  
599 model.

600

601 To examine whether the presence of even undetectably small quantities of vaccine virus in  
602 contact birds might affect the causal relationship between same-individual viral load and  
603 disease development, we carried out further multiple regression analyses with contact FVL  
604 nested within shedder vaccination treatment. For each response variable we used a mixed-  
605 effects model with the same random effects as described above, and fixed effect predictors  
606 shedder vaccination status, shedder DPI and contact bird sex alongside the nested contact  
607 FVL predictor.

608

#### 609 **Data availability**

610 The datasets generated and analysed during the current study are available in the Edinburgh  
611 DataShare repository, <https://doi.org/10.7488/ds/2598>.

612

#### 613 **Acknowledgements**

614 This project was supported by Agriculture and Food Research Initiative Competitive Grant  
615 no. 2016-67015-24914 from the USDA National Institute of Food and Agriculture  
616 (all authors). RIB's and ADW's contributions were partly funded by the BBSRC Institute  
617 Strategic Funding Grant to The Roslin Institute (BBS/E/D/20002173). The authors would  
618 like to thank the many farm staff and animal caretakers that provided daily care to the birds.  
619 Mention of trade names or commercial products in this publication is solely for the purpose  
620 of providing specific information and does not imply recommendation or endorsement by the  
621 U.S. Department of Agriculture.

622

623 **References**

- 624 1. Lessler J, Cummings DA. Mechanistic models of infectious disease and their impact  
625 on public health. *American journal of epidemiology*. 2016 Feb 17;183(5):415-22.
- 626 2. Halloran ME, Longini IM, Struchiner CJ, Longini IM. Design and analysis of vaccine  
627 studies. New York, NY: Springer; 2010.
- 628 3. Read AF, Mackinnon MJ. Pathogen evolution in a vaccinated world. *Evolution in*  
629 *health and disease*. 2008;2:139-52.
- 630 4. Keeling M, Tildesley M, House T, Danon L. The mathematics of vaccination. *Math.*  
631 *Today*. 2013 Feb;49:40-3.
- 632 5. Read AF, Baigent SJ, Powers C, Kgosana LB, Blackwell L, Smith LP, Kennedy DA,  
633 Walkden-Brown SW, Nair VK. Imperfect vaccination can enhance the transmission  
634 of highly virulent pathogens. *PLoS Biology*. 2015 Jul 27;13(7):e1002198.
- 635 6. Bishop SC, Chesnais J, Stear MJ. Breeding for disease resistance: issues and  
636 opportunities. In *Proceedings of the 7th World Congress on Genetics Applied to*  
637 *Livestock Production.* (Ed. INRA)(Institut National de la Recherche Agronomique  
638 (INRA): Montpellier) 2002 Aug 19.
- 639 7. Glass EJ. Genetic variation and responses to vaccines. *Animal Health Research*  
640 *Reviews*. 2004 Dec;5(2):197-208.
- 641 8. Menanteau-Horta AM, Ames TR, Johnson DW, Meiske JC. Effect of maternal  
642 antibody upon vaccination with infectious bovine rhinotracheitis and bovine virus  
643 diarrhea vaccines. *Canadian journal of comparative medicine*. 1985 Jan;49(1):10.
- 644 9. Abdelwhab EM, Grund C, Aly MM, Beer M, Harder TC, Hafez HM. Multiple dose  
645 vaccination with heterologous H5N2 vaccine: immune response and protection  
646 against variant clade 2.2. 1 highly pathogenic avian influenza H5N1 in broiler breeder  
647 chickens. *Vaccine*. 2011 Aug 26;29(37):6219-25.

- 648 10. Cano JP, Dee SA, Murtaugh MP, Pijoan C. Impact of a modified-live porcine  
649 reproductive and respiratory syndrome virus vaccine intervention on a population of  
650 pigs infected with a heterologous isolate. *Vaccine*. 2007 May 30;25(22):4382-91.
- 651 11. Davis NL, Caley IJ, Brown KW, Betts MR, Irlbeck DM, McGrath KM, Connell MJ,  
652 Montefiori DC, Frelinger JA, Swanstrom R, Johnson PR. Vaccination of macaques  
653 against pathogenic simian immunodeficiency virus with Venezuelan equine  
654 encephalitis virus replicon particles. *Journal of virology*. 2000 Jan 1;74(1):371-8.
- 655 12. Linhares DC, Cano JP, Wetzell T, Nerem J, Torremorell M, Dee SA. Effect of  
656 modified-live porcine reproductive and respiratory syndrome virus (PRRSv) vaccine  
657 on the shedding of wild-type virus from an infected population of growing pigs.  
658 *Vaccine*. 2012 Jan 5;30(2):407-13.
- 659 13. Nodelijk G, De Jong MC, Van Leengoed LA, Wensvoort G, Pol JM, Steverink PJ,  
660 Verheijden JH. A quantitative assessment of the effectiveness of PRRSV vaccination  
661 in pigs under experimental conditions. *Vaccine*. 2001 Jun 14;19(27):3636-44.
- 662 14. Rose N, Renson P, Andraud M, Paboeuf F, Le Potier MF, Bourry O. Porcine  
663 reproductive and respiratory syndrome virus (PRRSv) modified-live vaccine reduces  
664 virus transmission in experimental conditions. *Vaccine*. 2015 May 15;33(21):2493-9.
- 665 15. Trus I, Bonckaert C, van der Meulen K, Nauwynck HJ. Efficacy of an attenuated  
666 European subtype 1 porcine reproductive and respiratory syndrome virus (PRRSV)  
667 vaccine in pigs upon challenge with the East European subtype 3 PRRSV strain Lena.  
668 *Vaccine*. 2014 May 23;32(25):2995-3003.
- 669 16. Churcher TS, Sinden RE, Edwards NJ, Poulton ID, Rampling TW, Brock PM, Griffin  
670 JT, Upton LM, Zakutansky SE, Sala KA, Angrisano F. Probability of transmission of  
671 malaria from mosquito to human is regulated by mosquito parasite density in naive  
672 and vaccinated hosts. *PLoS pathogens*. 2017 Jan 12;13(1):e1006108.



- 673 17. Velthuis AG, De Jong MC, Kamp EM, Stockhofe N, Verheijden JH. Design and  
674 analysis of an *Actinobacillus pleuropneumoniae* transmission experiment. *Preventive*  
675 *veterinary medicine*. 2003 Jul 30;60(1):53-68.
- 676 18. Shim E, Galvani AP. Distinguishing vaccine efficacy and effectiveness. *Vaccine*.  
677 2012 Oct 19;30(47):6700-5.
- 678 19. Haas CN. Microbial dose response modeling: past, present, and future. *Environmental*  
679 *Science & Technology*. 2015 Jan 12;49(3):1245-59.
- 680 20. Aaby P, Bukh J, Lisse IM, Smits AJ. Overcrowding and intensive exposure as  
681 determinants of measles mortality. *American journal of epidemiology*. 1984 Jul  
682 1;120(1):49-63.
- 683 21. Anderson RM, May RM. *Infectious diseases of humans: dynamics and control*.  
684 Oxford university press; 1992 Aug 27.
- 685 22. Anderson RA, Donnelly CA, Ferguson NM, Woolhouse ME, Watt CJ, Udy HJ,  
686 MaWhinney S, Dunstan SP, Southwood TR, Wilesmith JW, Ryan JB. Transmission  
687 dynamics and epidemiology of BSE in British cattle. *Nature*. 1996  
688 Aug;382(6594):779.
- 689 23. Buchanan RL, Smith JL, Long W. Microbial risk assessment: dose-response relations  
690 and risk characterization. *International journal of food microbiology*. 2000 Jul  
691 15;58(3):159-72.
- 692 24. Havelaar AH, Swart AN. Impact of acquired immunity and dose-dependent  
693 probability of illness on quantitative microbial risk assessment. *Risk Analysis*. 2014  
694 Oct;34(10):1807-19.
- 695 25. Hornick RB, Music SI, Wenzel R, Cash R, Libonati JP, Snyder MJ, Woodward TE.  
696 The Broad Street pump revisited: response of volunteers to ingested cholera vibrios.  
697 *Bulletin of the New York Academy of Medicine*. 1971 Oct;47(10):1181.

- 698 26. Kothary MH, Babu US. Infective dose of foodborne pathogens in volunteers: a  
699 review. *Journal of food safety*. 2001 May;21(1):49-68.
- 700 27. Powell PC, Lawn AM, Payne LN, Rennie M, Ross LJ. The effect of virus dose on the  
701 development of Marek's disease in two strains of chickens. *Avian Pathology*. 1980  
702 Oct 1;9(4):567-74.
- 703 28. Morrow C, Fehler F. Marek's disease: a worldwide problem. In *Marek's disease 2004*  
704 Jan 1 (pp. 49-61). Academic Press.
- 705 29. Calnek BW, Adldinger HK, Kahn DE. Feather follicle epithelium: a source of  
706 enveloped and infectious cell-free herpesvirus from Marek's disease. *Avian diseases*.  
707 1970 May 1:219-33.
- 708 30. Baaten BJ, Staines KA, Smith LP, Skinner H, Davison TF, Butter C. Early replication  
709 in pulmonary B cells after infection with Marek's disease herpesvirus by the  
710 respiratory route. *Viral immunology*. 2009 Dec 1;22(6):431-44.
- 711 31. Purchase HG. Clinical disease and its economic impact. In *Marek's Disease 1985* (pp.  
712 17-42). Springer, Boston, MA.
- 713 32. Sharma JM. Laboratory diagnosis. In *Marek's Disease 1985* (pp. 151-175). Springer,  
714 Boston, MA.
- 715 33. Witter RL, Nazerian K, Purchase HG, Burgoyne GH. Isolation from turkeys of a cell-  
716 associated herpesvirus antigenically related to Marek's disease virus. *American*  
717 *journal of veterinary research*. 1970;31:525-38.
- 718 34. Witter RL. The changing landscape of Marek's disease. *Avian Pathology*. 1998 Apr  
719 1;27(S1):S46-53.
- 720 35. Dunn JR, Gimeno IM. Current status of Marek's disease in the United States and  
721 worldwide based on a questionnaire survey. *Avian diseases*. 2013 Jan 8;57(2s1):483-  
722 90.

- 723 36. Islam T, Renz KG, Walkden-Brown SW, Ralapanawe S. Viral kinetics, shedding  
724 profile, and transmission of serotype 1 Marek's disease vaccine Rispens/CVI988 in  
725 maternal antibody-free chickens. *Avian diseases*. 2013 Jan 15;57(2s1):454-63.
- 726 37. Islam AF, Groves PJ, Underwood GJ, Walkden-Brown SW. Dynamics of Marek's  
727 disease virus and herpesvirus of turkey shedding in feather dander of broiler chickens.  
728 InProceedings of the 17th Australian Poultry Science Symposium, Sydney, New  
729 South Wales, Australia, 7-9 February 2005 2005 (pp. 105-108). Poultry Research  
730 Foundation.
- 731 38. Islam A, Walkden-Brown SW. Quantitative profiling of the shedding rate of the three  
732 Marek's disease virus (MDV) serotypes reveals that challenge with virulent MDV  
733 markedly increases shedding of vaccinal viruses. *Journal of General Virology*. 2007  
734 Aug 1;88(8):2121-8.
- 735 39. Cho BR. Horizontal transmission of turkey herpesvirus to chickens. 5. Airborne  
736 transmission between chickens. *Poultry science*. 1976 Sep;55(5):1830-3.
- 737 40. Cho BR, Kenzy SG. Horizontal Transmission of Turkey Herpesvirus to Chickens: 2.  
738 Some Factors Affecting Transmission. *Poultry science*. 1973 Mar 1;52(2):608-13.
- 739 41. Cho BR, Kenzy SG. Horizontal Transmission of Turkey Herpesvirus to Chickens: 3.  
740 Transmission in Three Different Lines of Chickens. *Poultry Science*. 1975 Jan  
741 1;54(1):109-15.
- 742 42. Witter RL. Increased virulence of Marek's disease virus field isolates. *Avian diseases*.  
743 1997;41(1):149-63.
- 744 43. Bacon LD, Hunt HD, Cheng HH. A review of the development of chicken lines to  
745 resolve genes determining resistance to diseases. *Poultry science*. 2000 Aug  
746 1;79(8):1082-93.

- 747 44. Witter RL. Protective efficacy of Marek's disease vaccines. In Marek's Disease 2001  
748 (pp. 57-90). Springer, Berlin, Heidelberg.
- 749 45. Dunn JR, Witter RL, Silva RF, Lee LF, Finlay J, Marker BA, Kaneene JB, Fulton  
750 RM, Fitzgerald SD. The effect of the time interval between exposures on the  
751 susceptibility of chickens to superinfection with Marek's disease virus. Avian  
752 diseases. 2010 Sep;54(3):1038-49.
- 753 46. Cortes AL, Montiel ER, Lemiere S, Gimeno IM. Comparison of blood and feather  
754 pulp samples for the diagnosis of Marek's disease and for monitoring Marek's disease  
755 vaccination by real time-PCR. Avian diseases. 2011 Jun;55(2):302-10.
- 756 47. Kennedy DA, Dunn PA, Read AF. Modeling Marek's disease virus transmission: A  
757 framework for evaluating the impact of farming practices and evolution. Epidemics.  
758 2018 Jun 1;23:85-95.
- 759 48. Calnek BW, Hitchner SB. Localization of viral antigen in chickens infected with  
760 Marek's disease herpesvirus. Journal of the National Cancer Institute. 1969 Oct  
761 1;43(4):935-49.
- 762 49. Meeusen EN, Walker J, Peters A, Pastoret PP, Jungersen G. Current status of  
763 veterinary vaccines. Clinical microbiology reviews. 2007 Jul 1;20(3):489-510.
- 764 50. Gandon S, Mackinnon MJ, Nee S, Read AF. Imperfect vaccines and the evolution of  
765 pathogen virulence. Nature. 2001 Dec;414(6865):751.
- 766 51. McLean AR, Blower SM. Imperfect vaccines and herd immunity to HIV. Proceedings  
767 of the Royal Society of London. Series B: Biological Sciences. 1993 Jul  
768 22;253(1336):9-13.
- 769 52. Poland GA, Ovsyannikova IG, Jacobson RM, Smith DI. Heterogeneity in vaccine  
770 immune response: the role of immunogenetics and the emerging field of vaccinomics.  
771 Clinical Pharmacology & Therapeutics. 2007 Dec;82(6):653-64.

- 772 53. Anderson RM, May RM. Vaccination and herd immunity to infectious diseases.  
773 Nature. 1985 Nov;318(6044):323.
- 774 54. Bitsouni V, Lycett S, Opriessnig T, Doeschl-Wilson A Predicting vaccine  
775 effectiveness in livestock populations: A theoretical framework applied to PRRS virus  
776 infections in pigs. PLoS one. 2019 Aug 30;14(8): e0220738.
- 777 55. Doeschl-Wilson AB, Davidson R, Conington J, Roughsedge T, Hutchings MR,  
778 Villanueva B. Implications of host genetic variation on the risk and prevalence of  
779 infectious diseases transmitted through the environment. Genetics. 2011 Jul  
780 1;188(3):683-93.
- 781 56. Gomes MG, Lipsitch M, Wargo AR, Kurath G, Rebelo C, Medley GF, Coutinho A. A  
782 missing dimension in measures of vaccination impacts. PLoS pathogens. 2014 Mar  
783 6;10(3):e1003849.
- 784 57. Gomes MG, Gordon SB, Lalloo DG. Clinical trials: The mathematics of falling  
785 vaccine efficacy with rising disease incidence. Vaccine. 2016 Jun 8;34(27):3007.
- 786 58. Ralapanawe S, Walkden-Brown SW, Islam AF, Renz KG. Effects of Rispen CVI988  
787 vaccination followed by challenge with Marek's disease viruses of differing virulence  
788 on the replication kinetics and shedding of the vaccine and challenge viruses.  
789 Veterinary microbiology. 2016 Feb 1;183:21-9.
- 790 59. Barclay VC, Sim D, Chan BH, Nell LA, Rabaa MA, Bell AS, Anders RF, Read AF.  
791 The evolutionary consequences of blood-stage vaccination on the rodent malaria  
792 Plasmodium chabaudi. PLoS biology. 2012 Jul 31;10(7):e1001368.
- 793 60. Mackinnon MJ, Read AF. Immunity promotes virulence evolution in a malaria model.  
794 PLoS Biology. 2004 Jun 22;2(9):e230.
- 795 61. Crow JF, Kimura M. An introduction to population genetics theory. An introduction  
796 to population genetics theory. 1970.

- 797 62. Hunt HD, Dunn JR. The influence of host genetics on Marek's disease virus  
798 evolution. *Avian diseases*. 2013 Jun 15;57(2s1):474-82.
- 799 63. Bacon LD, Hunt HD, Cheng HH. Genetic resistance to Marek's disease. In *Marek's*  
800 *Disease 2001* (pp. 121-141). Springer, Berlin, Heidelberg.
- 801 64. Bishop SC, Woolliams JA. Genomics and disease resistance studies in livestock.  
802 *Livestock science*. 2014 Aug 1;166:190-8.
- 803 65. Thornton PK. Livestock production: recent trends, future prospects. *Philosophical*  
804 *Transactions of the Royal Society B: Biological Sciences*. 2010 Sep  
805 27;365(1554):2853-67.
- 806 66. Abdul-Careem MF, Hunter DB, Shanmuganathan S, Haghighi HR, Read L, Heidari  
807 M, Sharif S. Cellular and cytokine responses in feathers of chickens vaccinated  
808 against Marek's disease. *Veterinary immunology and immunopathology*. 2008 Dec  
809 15;126(3-4):362-6.
- 810 67. Dunn JR, Silva RF. Ability of MEQ-deleted MDV vaccine candidates to adversely  
811 affect lymphoid organs and chicken weight gain. *Avian diseases*. 2012 Sep;56(3):494-  
812 500.
- 813 68. Dunn JR, Dimitrov KM, Miller PJ, Garcia M, Turner-Alston K, Brown A, Hartman  
814 A. Evaluation of Protective Efficacy When Combining Turkey Herpesvirus-Vector  
815 Vaccines. *Avian Diseases*. 2018 Dec 17;63(1):75-83.
- 816 69. R Core Team (2019). R: A language and environment for statistical computing. R  
817 Foundation for Statistical Computing, Vienna, Austria. URL [https://www.R-](https://www.R-project.org/)  
818 [project.org/](https://www.R-project.org/).
- 819 70. Bates D, Mächler M, Bolker B, Walker S. Fitting linear mixed-effects models using  
820 lme4. *Journal of Statistical Software*. 2015 June 30; 67(1):1-48.  
821 doi:10.18637/jss.v067.i01.

- 822        71. Therneau TM, Grambsch PM. Modeling survival data: extending the Cox model.  
823            Springer Science & Business Media; 2013 Nov 11.
- 824        72. Christensen, RHB. ordinal - Regression Models for Ordinal Data. R package version  
825            2019.4-25. <http://www.cran.r-project.org/package=ordinal/>.
- 826        73. Judd CM, Kenny DA. Process analysis: Estimating mediation in treatment  
827            evaluations. *Evaluation review*. 1981 Oct;5(5):602-19.
- 828        74. McCune B, Mefford MJ. PC-ORD: multivariate analysis of ecological data: version 7  
829            for Windows. MjM software design. 2016.
- 830

831 **Author contributions**

832 JRD led project conceptualization, experimental design and funding acquisition, alongside  
833 ADW, HHC and OA. Experimentation and data curation were carried out by JRD (lead),  
834 JKM and HHC. RIB took the lead in statistical analysis with contributions from MCT and  
835 ADW. RIB led interpretation of results and manuscript writing, alongside ADW, JRD, HHC,  
836 MCT. All authors contributed to reviewing and editing the manuscript.

837

838 **Competing interests**

839 The authors declare no competing interests.

840

841 **Materials & Correspondence**

842 Requests for physical materials and raw data should be addressed to JRD. Requests for  
843 analysis scripts and outputs should be addressed to ADW or RIB.



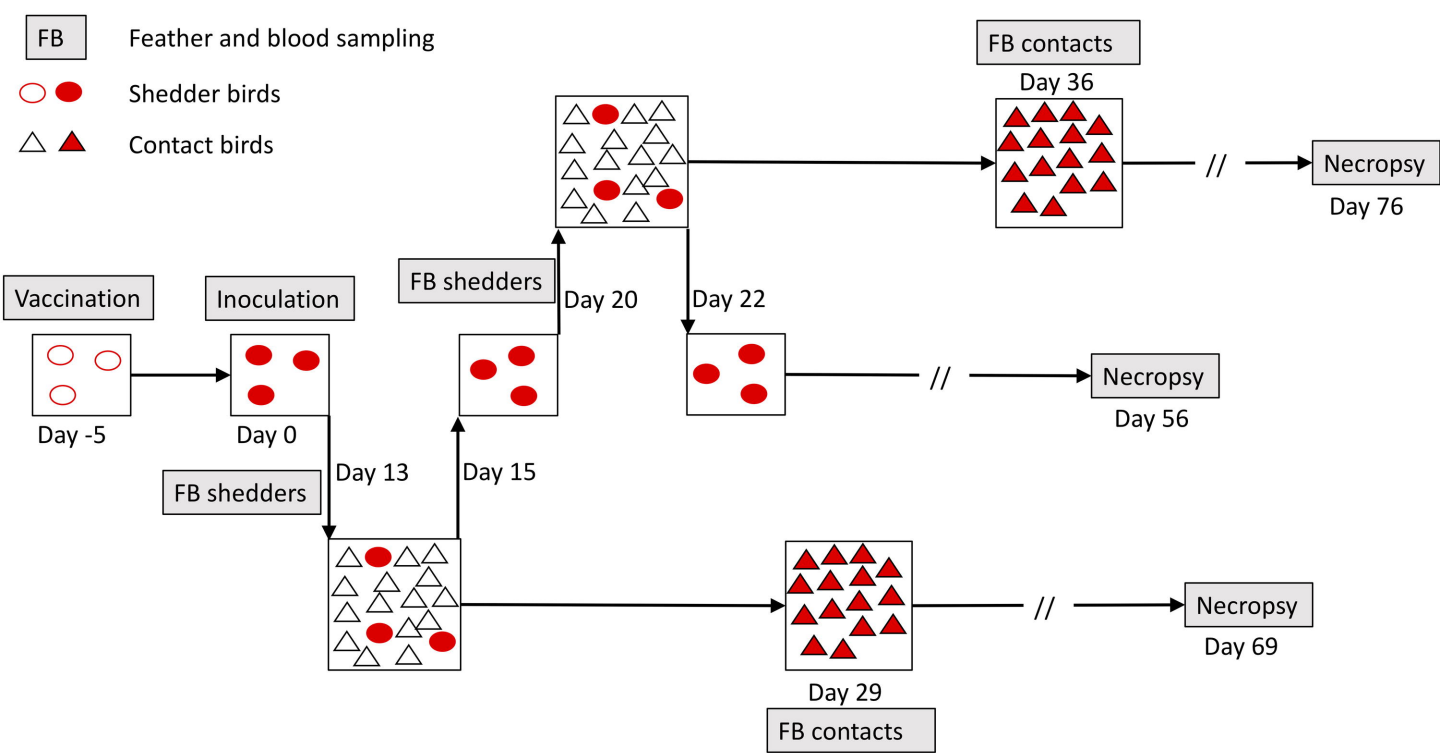

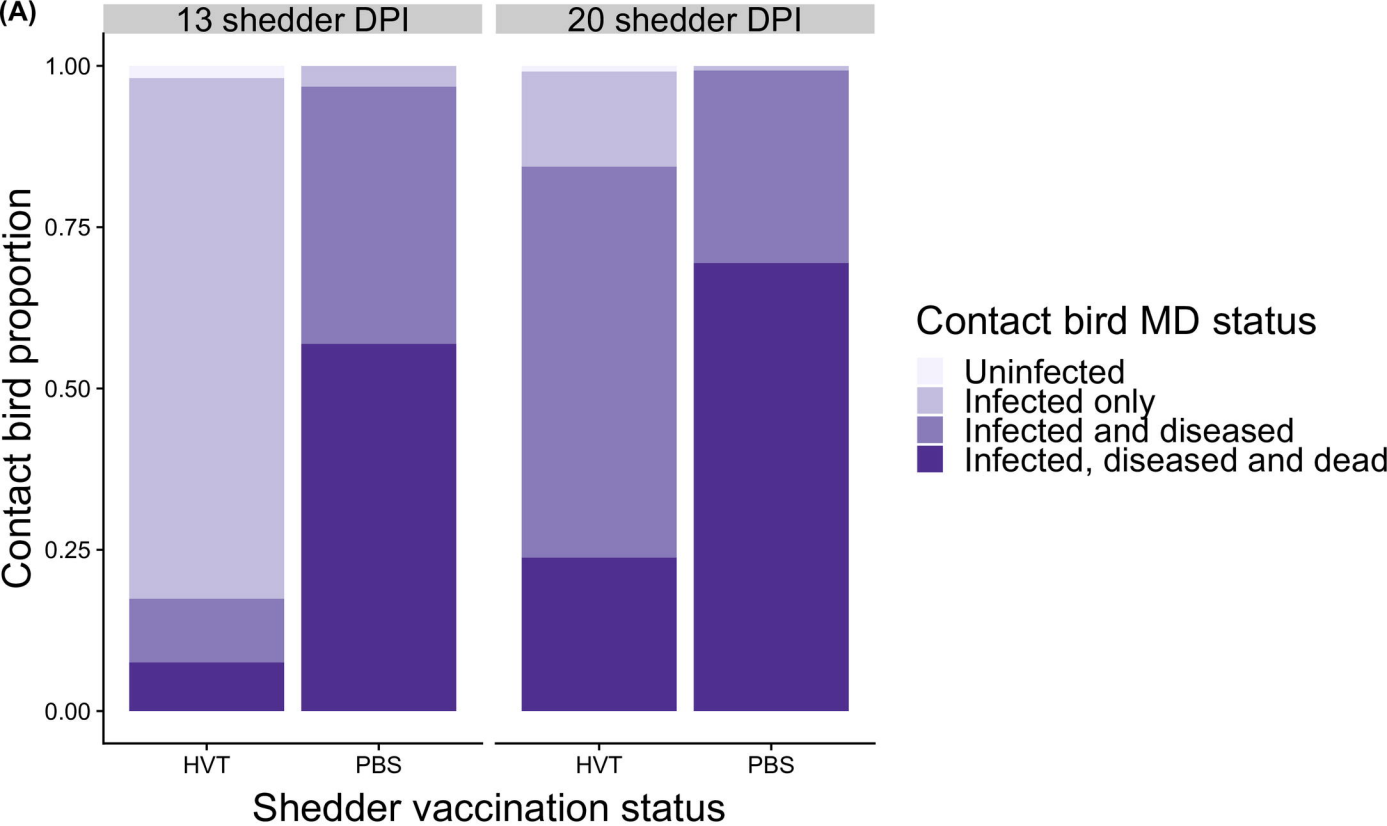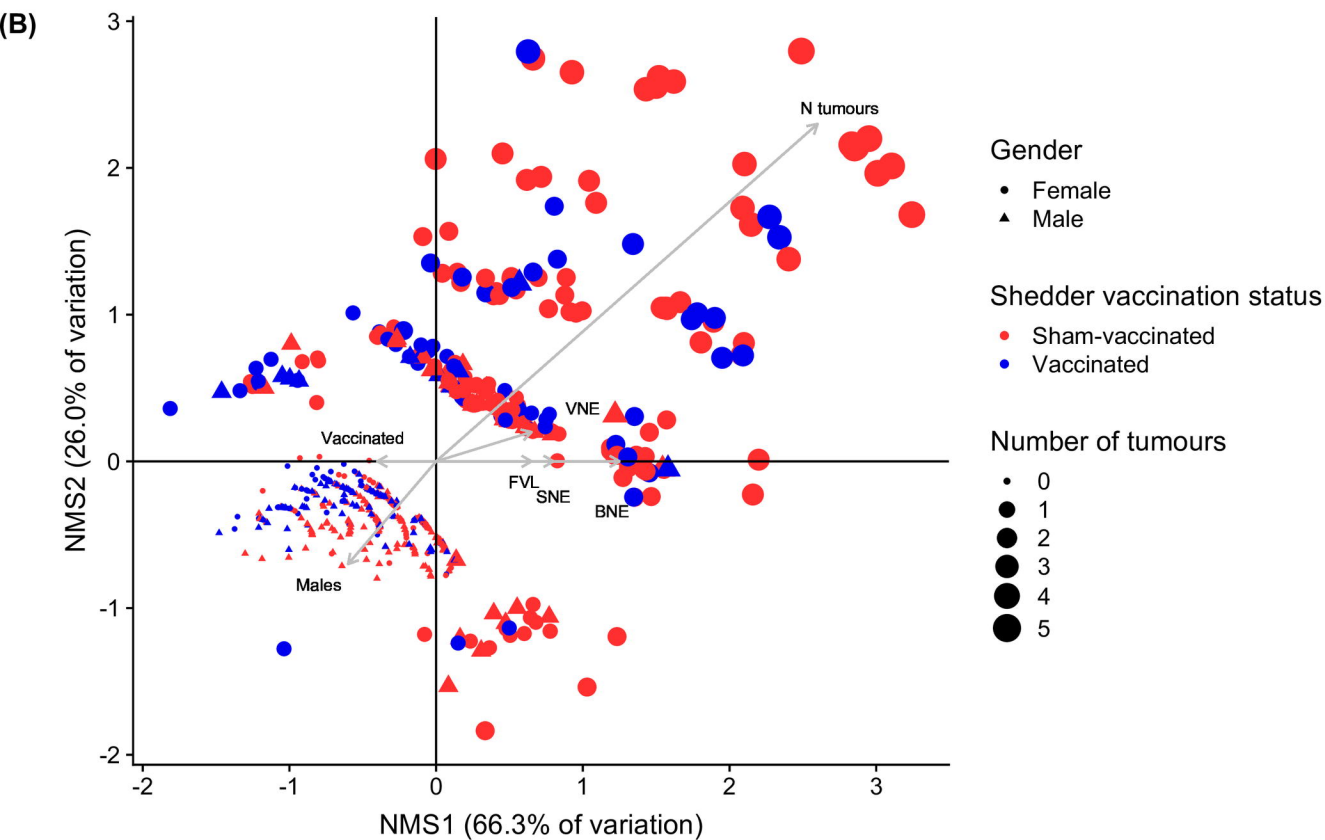

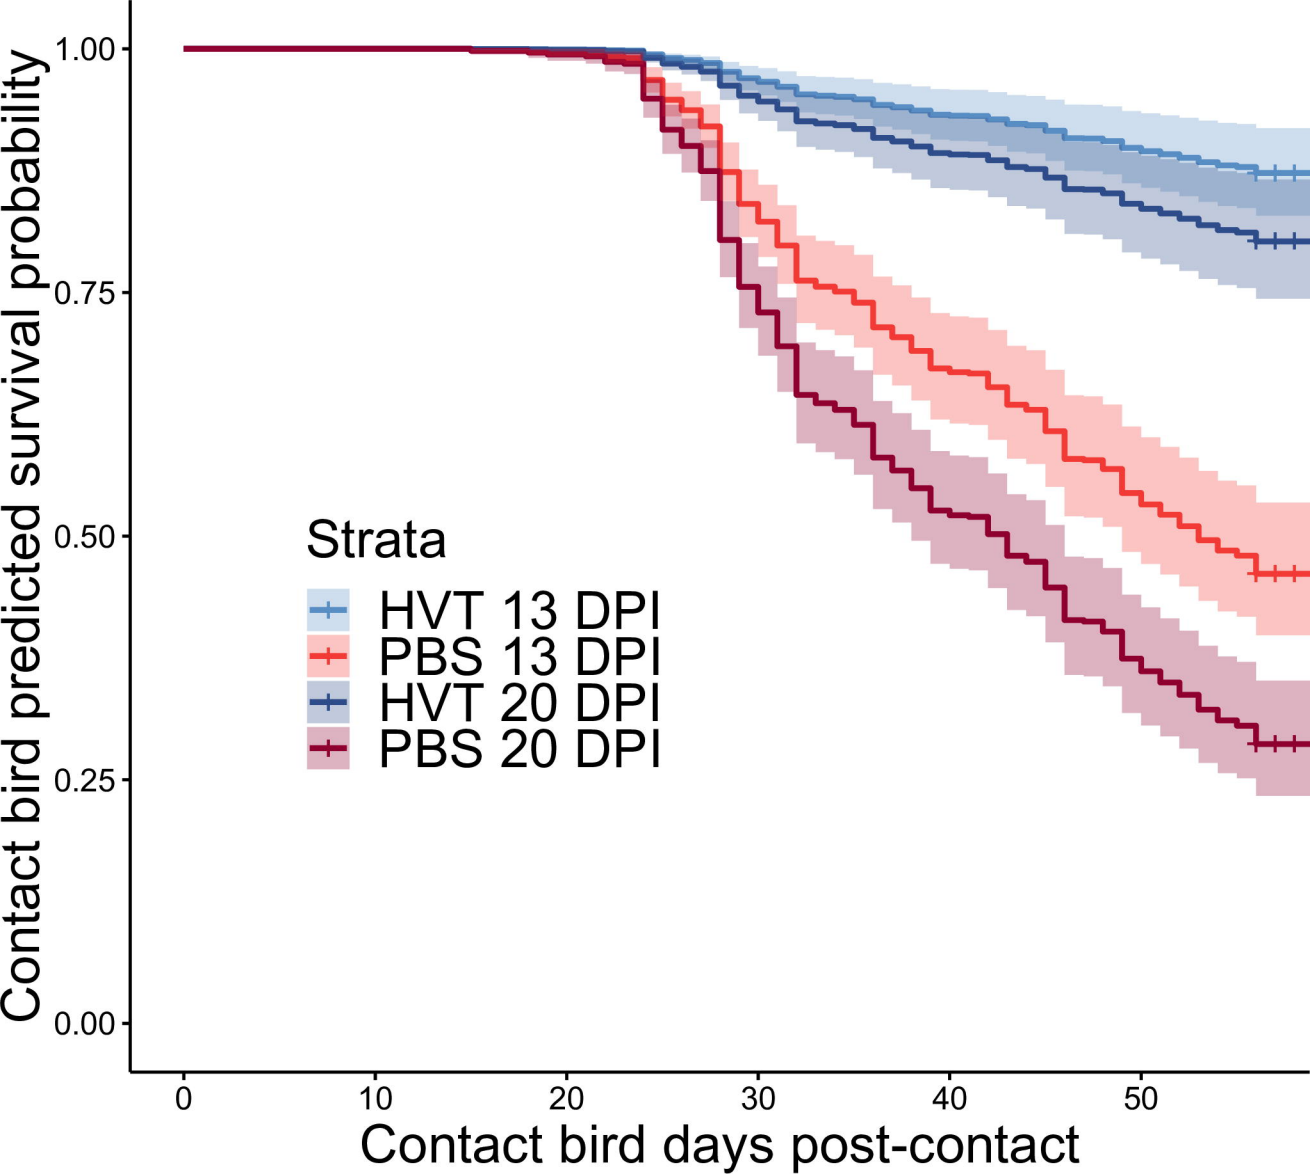

13 shedder days post-infection

20 shedder days post-infection

Log<sub>10</sub>(viral load + 1e-5)

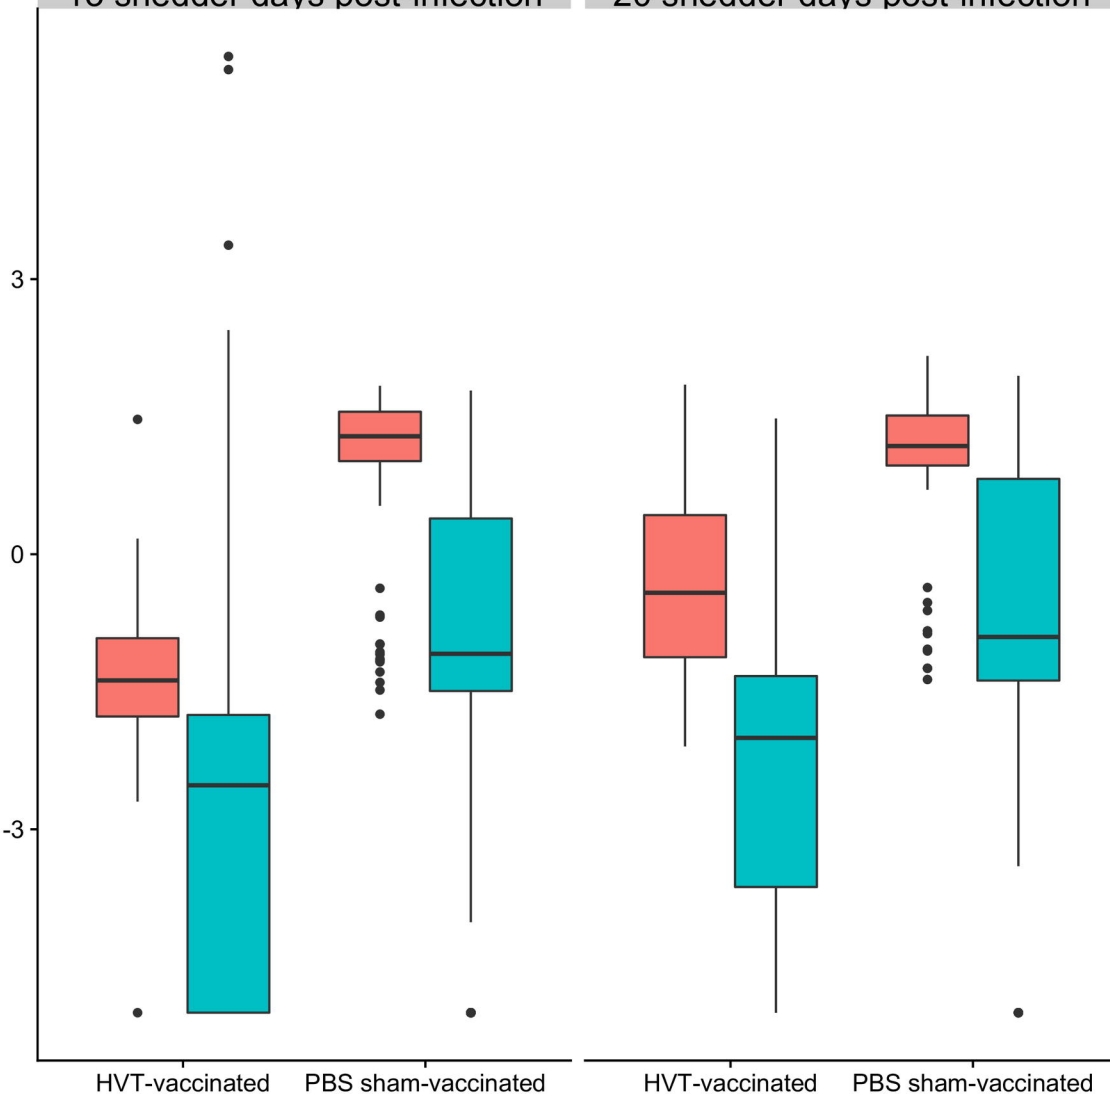

Key

- Shedder
- Contact bird

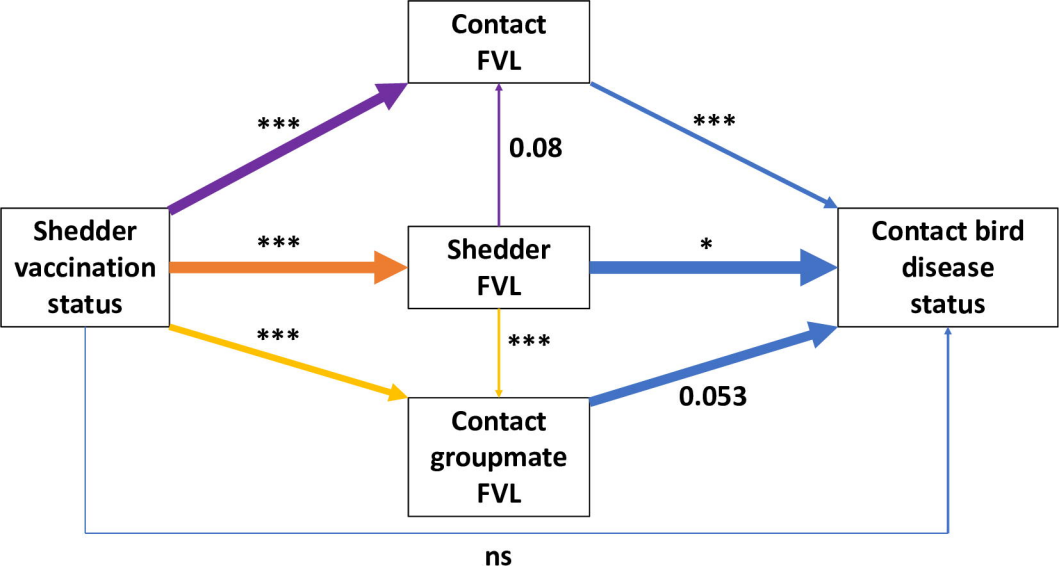

Source: https://www.biorxiv.org/content/10.1101/830570v2.full.pdf
